# Supplementary material
Source: publisher site journal article supplement (https://www.dovepress.com/article/456025)
Supplement: Supplementary file 1 [file get_supplementary_file.php]

| Table S1 Multivariable linear regression estimates of insomnia symptoms (0-12) by chronic diseases and other background characteristics | | |
| --- | --- | --- |
| Variables | Men | Women |
| Adjusted coef. (95% CI) | Adjusted coef. (95% CI) |
| Age (in years) |  |  |
| 60-69 | Ref. | Ref. |
| 70-79 | 0.16 (-0.02 - 0.35) | -0.02 (-0.26 - 0.22) |
| 80+ | 0.36* (0.03 - 0.69) | 0.16 (-0.17 - 0.49) |
| Educational status |  |  |
| None | Ref. | Ref. |
| Primary | -0.16 (-0.38 - 0.05) | 0.1566 |
| Secondary | -0.34** (-0.55 - -0.14) | -0.77*** (-1.16 - -0.38) |
| Higher | -0.52*** (-0.82 - -0.23) | -0.94*** (-1.43 - -0.44) |
| Marital status |  |  |
| Currently married | Ref. | Ref. |
| Widowed | 0.09 (-0.15 - 0.33) | 0.05 (-0.17 - 0.27) |
| Others | -0.39 (-0.85 - 0.07) | -0.16 (-0.69 - 0.36) |
| Living arrangement |  |  |
| Alone | Ref. | Ref. |
| With spouse | -0.52 (-1.20 - 0.16) | -0.54** (-0.94 - -0.15) |
| With others | -0.27 (-0.93 - 0.39) | 0.224 |
| Work status |  |  |
| Never worked | Ref. | Ref. |
| Currently not working | 0.30 (-0.17 - 0.77) | 0.34** (0.12 - 0.55) |
| Currently working | -0.19 (-0.66 - 0.28) | -0.20 (-0.45 - 0.05) |
| Retired | 0.04 (-0.47 - 0.56) | 0.56* (0.02 - 1.10) |
| MPCE quintile |  |  |
| Poorest | Ref. | Ref. |
| Poorer | -0.09 (-0.33 - 0.15) | -0.06 (-0.33 - 0.20) |
| Middle | -0.01 (-0.25 - 0.23) | 0.04 (-0.22 - 0.29) |
| Richer | -0.04 (-0.28 - 0.21) | -0.12 (-0.36 - 0.13) |
| Richest | 0.02 (-0.25 - 0.30) | -0.03 (-0.37 - 0.32) |
| Religion |  |  |
| Hindu | Ref. | Ref. |
| Muslim | -0.08 (-0.31 - 0.16) | 0.15 (-0.16 - 0.45) |
| Others | -0.27 (-0.55 - 0.02) | -0.20 (-0.48 - 0.08) |
| Caste |  |  |
| SC/ST | Ref. | Ref. |
| OBC | -0.07 (-0.28 - 0.13) | -0.15 (-0.38 - 0.08) |
| Others | -0.16 (-0.39 - 0.06) | 0.03 (-0.23 - 0.30) |
| Place of residence |  |  |
| Urban | Ref. | Ref. |
| Rural | 0.21* (0.01 - 0.41) | 0.37** (0.11 - 0.62) |
| Physical activity |  |  |
| None | Ref. | Ref. |
| Only vigorous activity | 0.09 (-0.26 - 0.43) | 0.28 (-0.14 - 0.69) |
| Only moderate activity | 0.01 (-0.17 - 0.19) | 0.15 (-0.06 - 0.35) |
| Moderate and vigorous activity | -0.13 (-0.55 - 0.29) | -0.33 (-1.17 - 0.51) |
| Sleep medications |  |  |
| No | Ref. | Ref. |
| Yes | 3.61*** (2.94 - 4.27) | 2.93*** (2.48 - 3.38) |
| Hypertension |  |  |
| No | Ref. | Ref. |
| Yes | 0.37*** (0.18 - 0.56) | 0.52*** (0.33 - 0.70) |
| Diabetes |  |  |
| No | Ref. | Ref. |
| Yes | 0.11 (-0.12 - 0.34) | -0.15 (-0.42 - 0.12) |
| Neurological or psychiatric disorders |  |  |
| No | Ref. | Ref. |
| Yes | 0.77*** (0.34 - 1.21) | 0.97*** (0.49 - 1.45) |
| Chronic lung disease |  |  |
| No | Ref. | Ref. |
| Yes | 0.87*** (0.58 - 1.16) | 0.47 (-0.03 - 0.97) |
| Chronic heart disease |  |  |
| No | Ref. | Ref. |
| Yes | 0.26 (-0.19 - 0.71) | -0.35 (-1.16 - 0.46) |
| Stroke |  |  |
| No | Ref. | Ref. |
| Yes | 0.62* (0.14 - 1.09) | 0.78** (0.22 - 1.33) |
| Bone or joint related disease |  |  |
| No | Ref. | Ref. |
| Yes | 1.12*** (0.88 - 1.36) | 0.67*** (0.45 - 0.90) |
| Number of chronic diseases¥ |  |  |
| None | Ref. | Ref. |
| Single | 0.59*** (0.38 - 0.81) | 0.48*** (0.31 - 0.67) |
| Two | 1.01*** (0.76 - 1.23) | 1.01*** (0.73 - 1.28) |
| Three plus | 1.45*** (0.99 - 1.92) | 1.66*** (1.32 - 2.01) |

**if p<0.05, **if p<0.01, ***if p<0.001; Adjusted coef.: beta coefficients are adjusted for all the covariates such as age, education, marital status, living arrangement, work status, physical activity, sleep medications, wealth quintile, religion, caste, place of residence; MPCE: Monthly per capita consumption expenditure; SC/ST: Scheduled caste/scheduled tribe; OBC: Other backward class; ¥: Individual chronic diseases were not included in the covariates*

| Table S2 Multivariable logistic regression estimates (adjusted odds ratios) of each insomnia symptom by chronic conditions | | | | |
| --- | --- | --- | --- | --- |
| Chronic diseases | Men | | | |
| Difficulty falling asleep (17.76%) | Awake a lot during the night (21.65%) | Wake too early (21.10%) | Feel unrested during the day (21.09%) |
| Hypertension | 1.24** (1.07 - 1.45) | 1.25** (1.08 - 1.45) | 1.32*** (1.14 - 1.52) | 1.34*** (1.15 - 1.56) |
| Diabetes | 1.03 (0.85 - 1.24) | 1.18 (0.97 - 1.43) | 1.09 (0.91 - 1.31) | 1.14 (0.93 - 1.39) |
| Neurological or psychiatric disorders | 1.70** (1.23 - 2.36) | 1.58** (1.15 - 2.16) | 1.66** (1.21 - 2.29) | 1.53** (1.13 - 2.08) |
| Chronic lung disease | 1.84*** (1.47 - 2.30) | 1.60*** (1.31 - 1.95) | 1.83*** (1.47 - 2.26) | 1.55*** (1.25 - 1.92) |
| Chronic heart disease | 1.27 (0.92 - 1.75) | 1.46* (1.08 - 1.96) | 1.50** (1.11 - 2.02) | 1.10 (0.82 - 1.47) |
| Stroke | 1.49* (1.07 - 2.09) | 1.60** (1.15 - 2.23) | 1.59** (1.15 - 2.18) | 1.31 (0.96 - 1.78) |
| Bone or joint related disease | 1.91*** (1.59 - 2.29) | 2.05*** (1.73 - 2.44) | 2.05*** (1.73 - 2.44) | 1.75*** (1.46 - 2.10) |
|  | Women | | | |
| Difficulty falling asleep (24.20%) | Awake a lot during the night (27.81%) | Wake too early (26.64%) | Feel unrested during the day (23.18%) |
| Hypertension | 1.39*** (1.20 - 1.60) | 1.34*** (1.17 - 1.53) | 1.29*** (1.13 - 1.48) | 1.28*** (1.12 - 1.46) |
| Diabetes | 1.02 (0.82 - 1.26) | 0.92 (0.75 - 1.14) | 1.06 (0.86 - 1.29) | 0.99 (0.82 - 1.21) |
| Neurological or psychiatric disorders | 2.20*** (1.61 - 3.00) | 1.90*** (1.39 - 2.59) | 1.68*** (1.24 - 2.29) | 1.55** (1.12 - 2.15) |
| Chronic lung disease | 1.41** (1.09 - 1.83) | 1.38* (1.07 - 1.79) | 1.28 (0.99 - 1.65) | 1.47** (1.15 - 1.88) |
| Chronic heart disease | 1.33 (0.88 - 2.01) | 1.06 (0.71 - 1.60) | 1.13 (0.76 - 1.69) | 0.97 (0.68 - 1.40) |
| Stroke | 1.70** (1.22 - 2.36) | 1.58** (1.13 - 2.22) | 1.94*** (1.41 - 2.67) | 1.66** (1.17 - 2.35) |
| Bone or joint related disease | 1.59*** (1.35 - 1.86) | 1.52*** (1.30 - 1.76) | 1.35*** (1.16 - 1.57) | 1.29*** (1.11 - 1.49) |

**if p<0.05, **if p<0.01, ***if p<0.001; All models are adjusted for age, education, marital status, living arrangement, work status, physical activity, sleep medications, wealth quintile, religion, caste, place of residence*
